# Supplementary material
Source: Springer Nature journal article supplement (https://www.springerprofessional.de/resource/supplementary/13688_2014_11_MOESM7_ESM.pdf/11893768)

Precision error

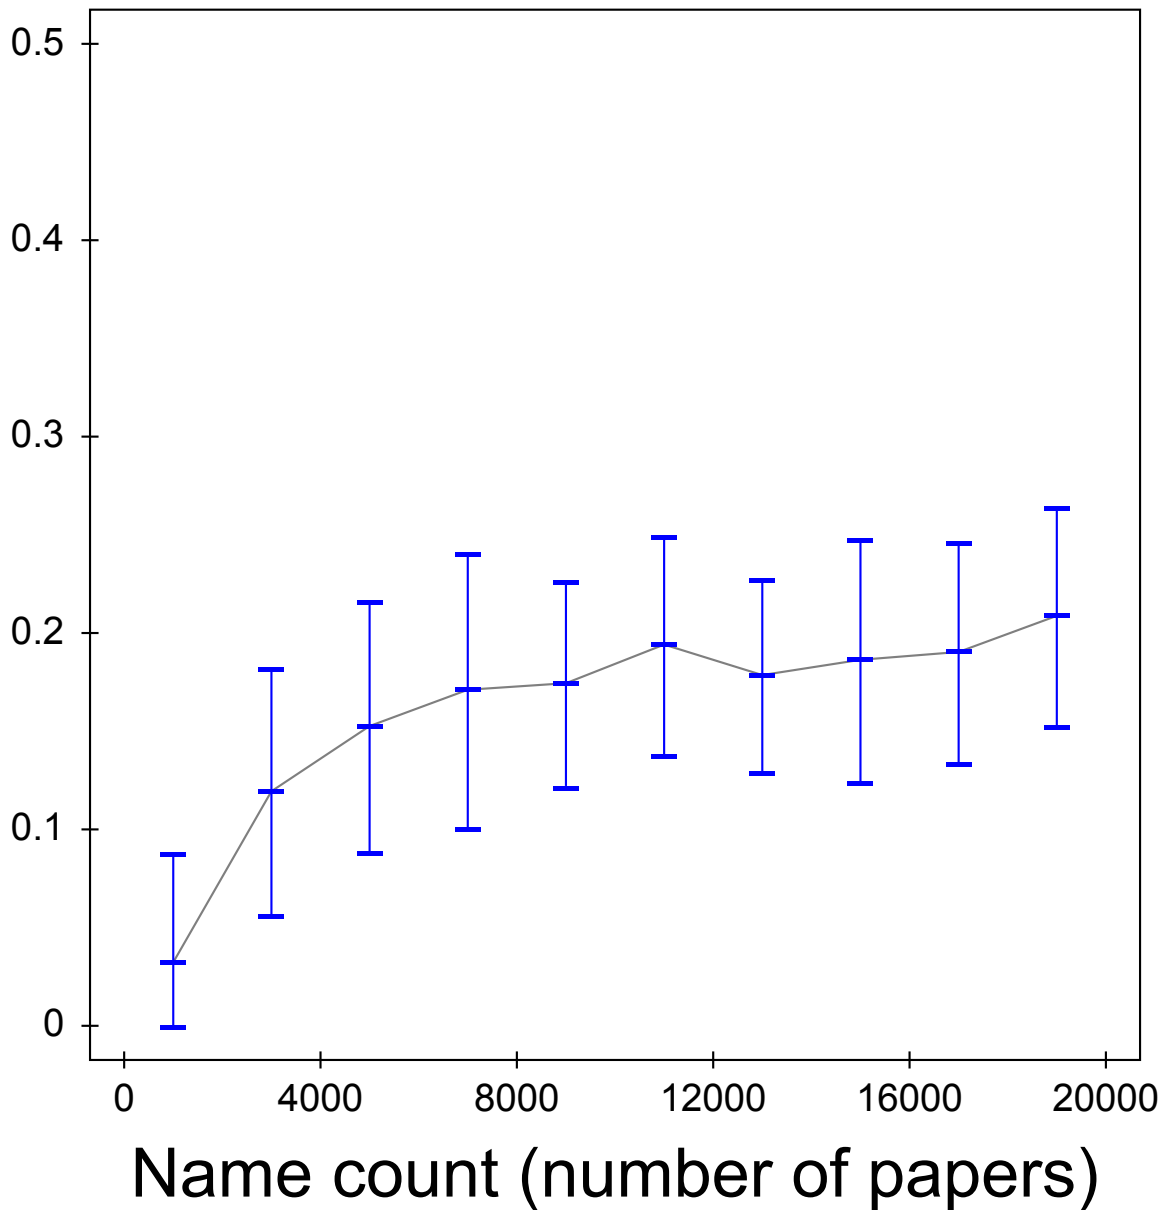

Supplement: MOESM7 [file 11893768]
